# Supplementary material for: Calpain Activator Dibucaine Induces Platelet Apoptosis
Source: Int J Mol Sci. 2011 Mar 25;12(4):2125–37. doi: 10.3390/ijms12042125 (PMC3127107; doi:10.3390/ijms12042125)

**Supplementary Figure I.** Dibucaine is a calpain-specific activator. Washed platelets were pre-treated with calpain inhibitor MDL28170 (100  $\mu\text{mol/L}$ ), calpain inhibitor I (100  $\mu\text{mol/L}$ ), calpain inhibitor II (250  $\mu\text{mol/L}$ ), and DMSO at room temperature (RT) for 10 min, respectively, and then were further treated with dibucaine (500  $\mu\text{mol/L}$ ) at RT for 15 min and subjected into western blot analysis using anti-filamin A antibody.

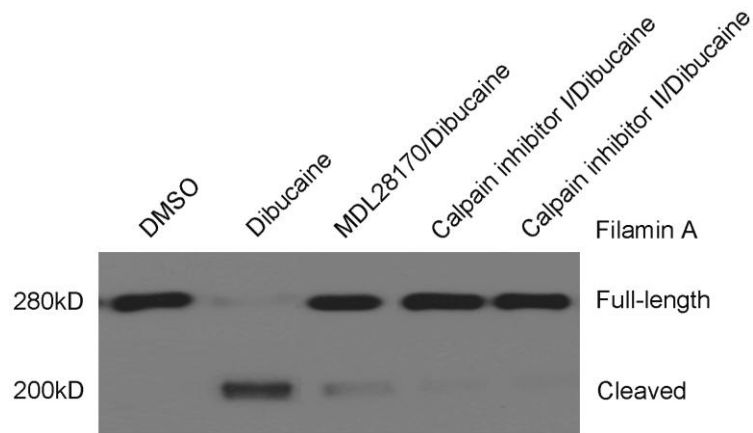

**Supplementary Figure II.** Effects of calcium chelators and caspase-3 inhibitors on dibucaine-induced cleavage of filamin A. Washed platelets were pre-treated with caspase-3 inhibitor z-DEVD-fmk (50  $\mu\text{mol/L}$ ), control DMSO, and EGTA (3 mmol/L) at RT for 15 min, respectively, and then were further treated with dibucaine (500  $\mu\text{mol/L}$ ) at RT for 15 min and subjected into western blot analysis using anti-filamin A antibody.

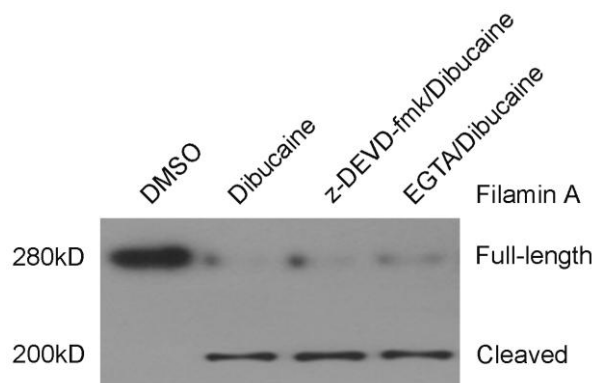

**Supplementary Figure III.** The caspase-3 inhibitor z-DEVD-fmk significantly inhibited PS exposure. Washed platelets were pre-treated with caspase-3 inhibitor z-DEVD-fmk (50  $\mu\text{mol/L}$ ) or control DMSO at RT for 15 min, and then were further incubated with dibucaine (500  $\mu\text{mol/L}$ ) at RT for 15 min and subjected into PS exposure analysis. Mean  $\pm$  SD of the percentage of PS-positive platelets from three independent experiments is shown. \*  $P < 0.05$  compared with DMSO. \*\*  $P < 0.01$  compared with DMSO. #  $P < 0.01$  represents the comparison between z-DEVD-fmk/Dibucaine and Dibucaine.

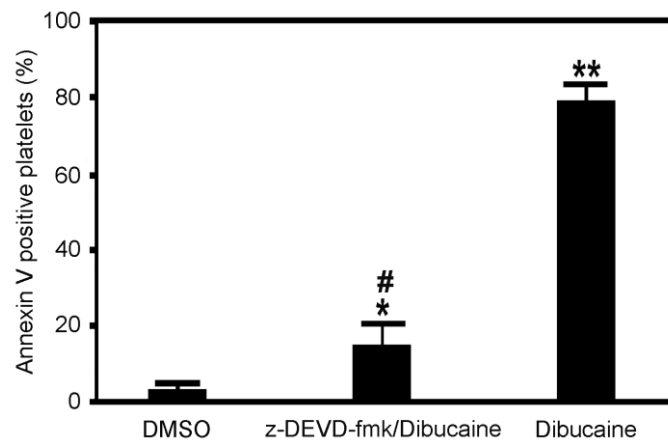

Supplement: Supplementary file 1 [file ijms-12-02125-s001.pdf]
